# Supplementary material for: Genome-wide approach to identify second gene targets for malignant rhabdoid tumors using high-density oligonucleotide microarrays
Source: PubMed Central journal article supplement — Cancer Sci. 2014 Feb 26;105(3):258–64. doi: 10.1111/cas.12352 (PMC4317948; doi:10.1111/cas.12352), 2014-02-26
Supplement: cas0105-0258-sd1.pdf [file cas0105-0258-sd1.pdf]

**Figure S1**

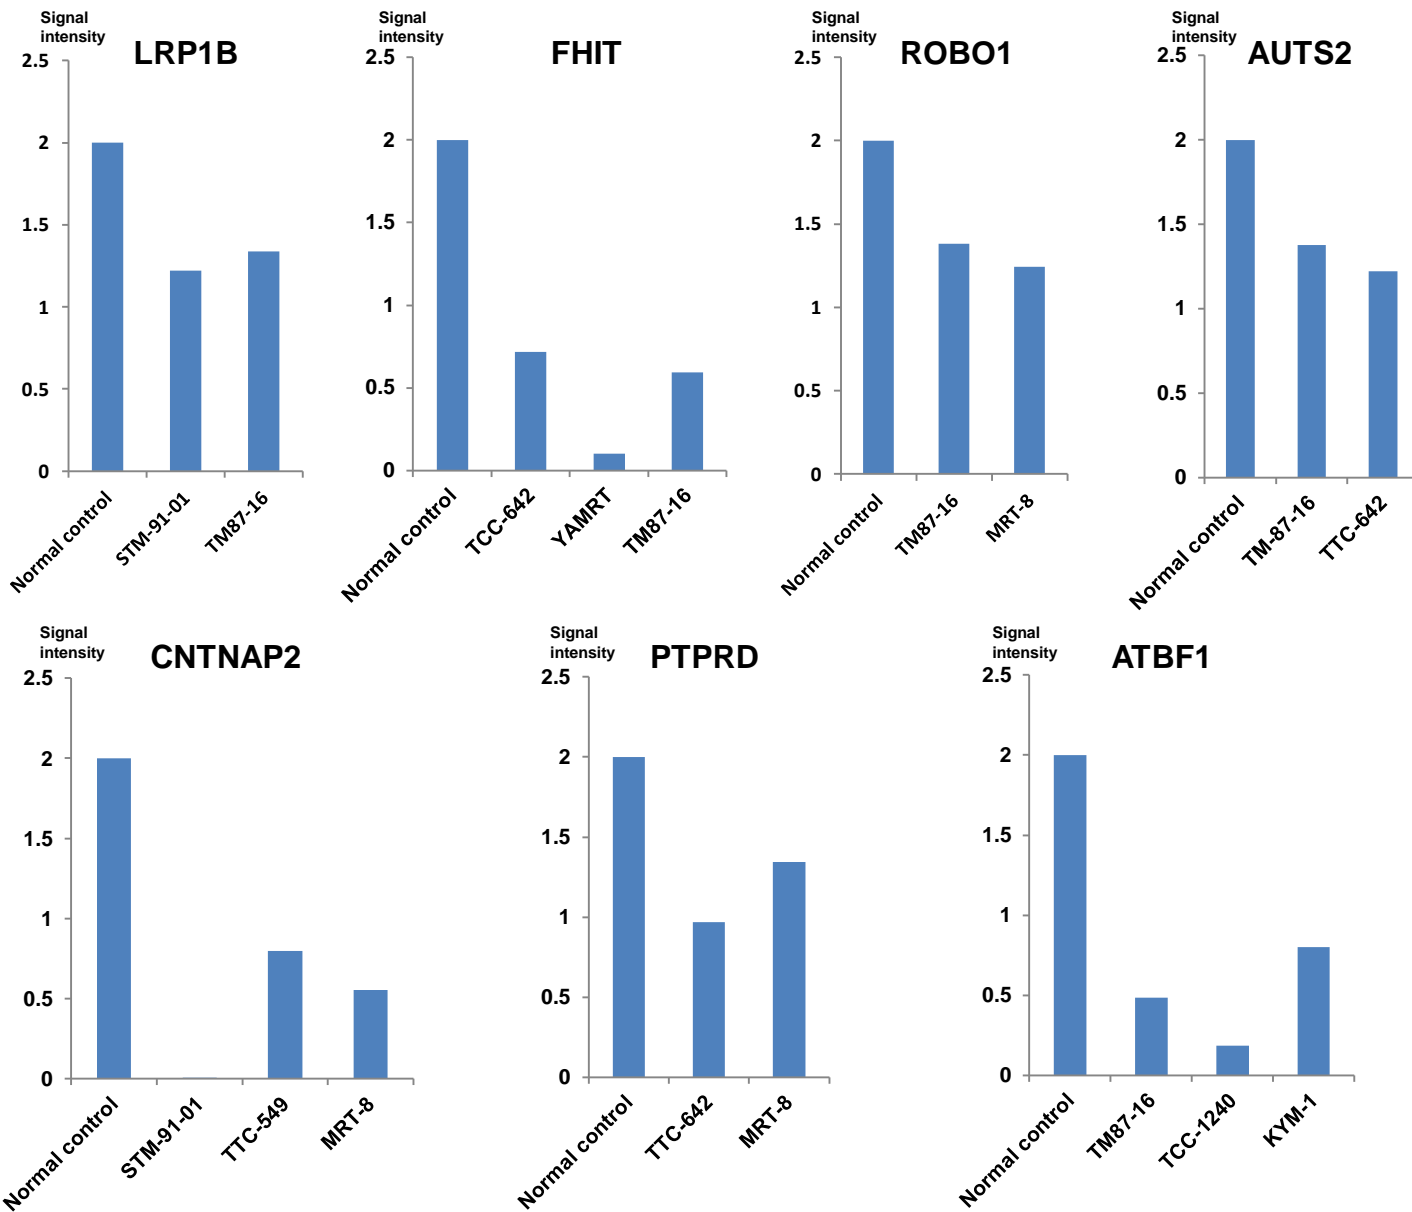

**Quantitative genomic PCR for chromosomal deletions detected SNP-chip analysis.** The concentration of the DNA was equalized by using GAPDH gene. Normal peripheral DNA was used as control. The signal intensities were indicated in the each vertical axis.
